# Supplementary material for: Clinical features for diagnosis of pneumonia among adults in primary care setting: A systematic and meta-review
Source: PubMed Central journal article supplement (PMC6527561; doi:10.1038/s41598-019-44145-y), 2019-05-20
Supplement: 41598_2019_44145_MOESM1_ESM.pdf [file 41598_2019_44145_MOESM1_ESM.pdf]

**Clinical features for diagnosis of pneumonia among adults in primary care setting: A systematic and meta-review**

**Tha Pyai HTUN, MBBS, MPH.**

Research Associate

Saw Swee Hock School of Public Health

National University of Singapore and National University Health System, Singapore

**Yinxiaohe SUN, MSc**

Research Assistant

Saw Swee Hock School of Public Health

National University of Singapore and National University Health System, Singapore

**Hui Lan CHUA, BSc**

Research Assistant

Saw Swee Hock School of Public Health

National University of Singapore and National University Health System, Singapore

**Junxiong PANG, MSc, PhD**

Assistant Professor

Saw Swee Hock School of Public Health

National University of Singapore and National University Health System, Singapore

**Keywords:** Clinical features, Pneumonia, Diagnosis, Primary Care, Adults

**Short title:** Clinical features and adult pneumonia in primary care setting

**Main Correspondence:**

PANG Junxiong, PhD

Assistant Professor, Centre for Infectious Disease Epidemiology & Research,

Saw Swee Hock School of Public Health and National University Health System,

Tahir Foundation Building, Level 9, 12 Science Drive 2, Singapore 117549;

E-mail: [ephpjv@nus.edu.sg](mailto:ephpjv@nus.edu.sg); [pangv@hotmail.com](mailto:pangv@hotmail.com)

Tel: +6566014993

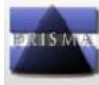

# PRISMA 2009 Checklist

| Section/topic                      | #  | Checklist item                                                                                                                                                                                                                                                                                              | Reported on page # |
|------------------------------------|----|-------------------------------------------------------------------------------------------------------------------------------------------------------------------------------------------------------------------------------------------------------------------------------------------------------------|--------------------|
| <b>TITLE</b>                       |    |                                                                                                                                                                                                                                                                                                             |                    |
| Title                              | 1  | Identify the report as a systematic review, meta-analysis, or both.                                                                                                                                                                                                                                         | 1                  |
| <b>ABSTRACT</b>                    |    |                                                                                                                                                                                                                                                                                                             |                    |
| Structured summary                 | 2  | Provide a structured summary including, as applicable: background; objectives; data sources; study eligibility criteria, participants, and interventions; study appraisal and synthesis methods; results; limitations; conclusions and implications of key findings; systematic review registration number. | 3 & 4              |
| <b>INTRODUCTION</b>                |    |                                                                                                                                                                                                                                                                                                             |                    |
| Rationale                          | 3  | Describe the rationale for the review in the context of what is already known.                                                                                                                                                                                                                              | 5                  |
| Objectives                         | 4  | Provide an explicit statement of questions being addressed with reference to participants, interventions, comparisons, outcomes, and study design (PICOS).                                                                                                                                                  | 5                  |
| <b>METHODS</b>                     |    |                                                                                                                                                                                                                                                                                                             |                    |
| Protocol and registration          | 5  | Indicate if a review protocol exists, if and where it can be accessed (e.g., Web address), and, if available, provide registration information including registration number.                                                                                                                               | 6                  |
| Eligibility criteria               | 6  | Specify study characteristics (e.g., PICOS, length of follow-up) and report characteristics (e.g., years considered, language, publication status) used as criteria for eligibility, giving rationale.                                                                                                      | 6,7                |
| Information sources                | 7  | Describe all information sources (e.g., databases with dates of coverage, contact with study authors to identify additional studies) in the search and date last searched.                                                                                                                                  | 6                  |
| Search                             | 8  | Present full electronic search strategy for at least one database, including any limits used, such that it could be repeated.                                                                                                                                                                               | 6                  |
| Study selection                    | 9  | State the process for selecting studies (i.e., screening, eligibility, included in systematic review, and, if applicable, included in the meta-analysis).                                                                                                                                                   | 6,7                |
| Data collection process            | 10 | Describe method of data extraction from reports (e.g., piloted forms, independently, in duplicate) and any processes for obtaining and confirming data from investigators.                                                                                                                                  | 6,7                |
| Data items                         | 11 | List and define all variables for which data were sought (e.g., PICOS, funding sources) and any assumptions and simplifications made.                                                                                                                                                                       | 6,7                |
| Risk of bias in individual studies | 12 | Describe methods used for assessing risk of bias of individual studies (including specification of whether this was done at the study or outcome level), and how this information is to be used in any data synthesis.                                                                                      | 7                  |
| Summary measures                   | 13 | State the principal summary measures (e.g., risk ratio, difference in means).                                                                                                                                                                                                                               | 8                  |
| Synthesis of results               | 14 | Describe the methods of handling data and combining results of studies, if done, including measures of consistency (e.g., $I^2$ ) for each meta-analysis.                                                                                                                                                   | 6,7,8              |

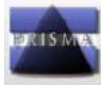

# PRISMA 2009 Checklist

| Section/topic                 | #  | Checklist item                                                                                                                                                                                           | Reported on page # |
|-------------------------------|----|----------------------------------------------------------------------------------------------------------------------------------------------------------------------------------------------------------|--------------------|
| Risk of bias across studies   | 15 | Specify any assessment of risk of bias that may affect the cumulative evidence (e.g., publication bias, selective reporting within studies).                                                             | 7                  |
| Additional analyses           | 16 | Describe methods of additional analyses (e.g., sensitivity or subgroup analyses, meta-regression), if done, indicating which were pre-specified.                                                         | 8                  |
| <b>RESULTS</b>                |    |                                                                                                                                                                                                          |                    |
| Study selection               | 17 | Give numbers of studies screened, assessed for eligibility, and included in the review, with reasons for exclusions at each stage, ideally with a flow diagram.                                          | 8,9                |
| Study characteristics         | 18 | For each study, present characteristics for which data were extracted (e.g., study size, PICOS, follow-up period) and provide the citations.                                                             | 12-18, S3          |
| Risk of bias within studies   | 19 | Present data on risk of bias of each study and, if available, any outcome level assessment (see item 12).                                                                                                | 10,11,12           |
| Results of individual studies | 20 | For all outcomes considered (benefits or harms), present, for each study: (a) simple summary data for each intervention group (b) effect estimates and confidence intervals, ideally with a forest plot. | 12-18, S3          |
| Synthesis of results          | 21 | Present results of each meta-analysis done, including confidence intervals and measures of consistency.                                                                                                  | 19, 20             |
| Risk of bias across studies   | 22 | Present results of any assessment of risk of bias across studies (see Item 15).                                                                                                                          | 10,11,12           |
| Additional analysis           | 23 | Give results of additional analyses, if done (e.g., sensitivity or subgroup analyses, meta-regression [see Item 16]).                                                                                    | 20-23              |
| <b>DISCUSSION</b>             |    |                                                                                                                                                                                                          |                    |
| Summary of evidence           | 24 | Summarize the main findings including the strength of evidence for each main outcome; consider their relevance to key groups (e.g., healthcare providers, users, and policy makers).                     | 24,25              |
| Limitations                   | 25 | Discuss limitations at study and outcome level (e.g., risk of bias), and at review-level (e.g., incomplete retrieval of identified research, reporting bias).                                            | 25, 26             |
| Conclusions                   | 26 | Provide a general interpretation of the results in the context of other evidence, and implications for future research.                                                                                  | 26                 |
| <b>FUNDING</b>                |    |                                                                                                                                                                                                          |                    |
| Funding                       | 27 | Describe sources of funding for the systematic review and other support (e.g., supply of data); role of funders for the systematic review.                                                               | 27, 28             |

From: Moher D, Liberati A, Tetzlaff J, Altman DG, The PRISMA Group (2009). Preferred Reporting Items for Systematic Reviews and Meta-Analyses: The PRISMA Statement. PLoS Med 6(7): e1000097. doi:10.1371/journal.pmed1000097

For more information, visit: [www.prisma-statement.org](http://www.prisma-statement.org).

# **Clinical features for diagnosis of pneumonia among adults in primary care setting: A systematic and meta-review**

## **Study Protocol**

### **OBJECTIVES**

The purpose of this study is to assess the predictive performance of clinical features associated with chest X-ray radiologically (CXR)-confirmed pneumonia compared to non-pneumonia patients in primary care settings among adults aged  $\geq 18$  years without serious illness and pre-existing immune suppression.

#### **Primary objectives**

1. To determine the strength of association between specific clinical signs and symptoms and the occurrence of CXR-confirmed pneumonia in primary care settings.
2. To determine the predictive performance of these specific clinical signs and symptoms to predict CXR-confirmed pneumonia in primary care settings.

### **METHODS**

#### **Study selection**

Inclusion criteria:

- Study design: Studies will be selected if they are published studies that assessed clinical predictors of community-acquired pneumonia without date restrictions and have conducted in ambulatory care or primary care settings.
- Population of interest: Participants aged  $\geq 18$  years without serious illness (e.g. mechanical ventilation) and pre-existing immune suppression (HIV, malnutrition, and immunosuppressant medication)
- Interventions: studies with clinical signs and symptoms associated with the reference standard of CXR for diagnosing pneumonia.
- Comparator: studies with control group which included patients without pneumonia confirmed by CXR.
- Outcomes: studies with CXR-confirmed pneumonia as outcome

Exclusion criteria:

- Studies lacking components mentioned above
- Narrative review, letters to editors, case reports and case series will be excluded

#### **Data abstraction**

The following information will be collected where available:

- Name of trial/author/journal
- Year of publication
- Study setting (country, clinical setting)
- Study design
- Randomization process, if any
- Diagnostic test for pneumonia
- Sample size
- Characteristics of study participants
- Control group
- Study results (clinical signs and symptoms) based on the outcomes of interest

### **Search strategy**

The search strategy consists of two phases. The first phase will be an extensive search using the identified index terms and keywords in three databases: PubMed, EMBASE and the Cochrane Library. The second phase will be an additional search of the references of retrieved articles to find any articles that did not appear in the databases search. Search will be limited to English language articles. The bibliographical software package, EndNote version X7 (Thomas Reuters, New York, NY, USA), will be used to import references and to remove duplicate references. The remaining studies will be checked against the inclusion and exclusion criteria. Two reviewers will independently screen eligibility based on title, abstracts and assessed full reports, resolving discrepancies by consensus.

### **Analysis plan**

- 2×2 tables for each study will be constructed to calculate sensitivity, specificity, positive and negative likelihood ratios and diagnostic odds ratio with 95% confidence intervals (CI).
- When four or more studies of specific clinical signs and symptoms are available that report on the same outcome of interest, the results will be pooled.
- Random effects meta-analysis will be used for all estimates of effect
- Considering the correlation between sensitivity and specificity within and across studies, bivariate model will be performed to calculate the pooled estimates of sensitivity, specificity, positive likelihood ratio, negative likelihood ratio and diagnostic odds ratio with 95% CIs.
- The final bivariate model will be computed using the mada package in R version 3.3.4.
- Pool estimates for less than four studies have limited validity and hence, was excluded.
- The index tests assessed at different thresholds will be pooled together and analysed.
- The Summary Receiver Operating Characteristics (SROC) curve for index tests (at least four included studies) will be computed using the Reitsma SROC model to obtain the summary point estimates of sensitivity and specificity as well as 95% predicting region and 95% confidence region for the summary operating point.
- Heterogeneity will be assessed using Chi-squared test available in RevMan with  $p < 0.05$  used to determine statistical significance.
- If  $> 10$  studies are available for an adherence intervention, funnel plots will be used to assess publication bias.
- The quality assessment of the studies will be done by using QUADAS-2 as recommended by the Cochrane collaboration. Studies will be assessed for selection of patient, index test, reference standard, and flow and timing. Signalling questions will be made to facilitate the rating of risk of bias into low, unclear or high.

### **Data management**

Outcome data will be extracted and compiled in a table by one author. After which, all extracted data will be cross-checked independently by another author by comparing them to the original data from the selected articles. However objections to the data will be addressed and resolved between all co-authors by consensus before proceeding with the analysis. The initial data analysis will address only the objectives specified above. Preliminary findings from these analyses will be circulated among contributing investigators for their comments and suggestions about further analysis.

### S3 Appendix. Diagnostic performance measures of each index test assesses in included studies

#### Socio-demographic

| Author, Year               | Index test | Total population | True positive | False negative | False positive | True negative | Sensitivity (95% CI) | Specificity (95% CI) | Positive likelihood ratio (95% CI) | Negative likelihood ratio (95% CI) | Diagnostic odds ratio (95% CI) |
|----------------------------|------------|------------------|---------------|----------------|----------------|---------------|----------------------|----------------------|------------------------------------|------------------------------------|--------------------------------|
| <b>Age</b>                 |            |                  |               |                |                |               |                      |                      |                                    |                                    |                                |
| Hopstaken et al., 2003     | Age ≥ 65   | 243              | 11            | 21             | 59             | 152           | 0.34<br>(0.20-0.52)  | 0.72<br>(0.66-0.78)  | 1.23<br>(0.72-2.08)                | 0.91<br>(0.70-1.19)                | 1.3                            |
| <b>Gender</b>              |            |                  |               |                |                |               |                      |                      |                                    |                                    |                                |
| Ebrahimzadeh, et al., 2015 | Male       | 840              | 220           | 200            | 227            | 193           | 0.52<br>(0.48-0.57)  | 0.46<br>(0.41-0.51)  | 0.97<br>(0.85-1.1)                 | 1.04<br>(0.90-1.20)                | 0.9                            |
| Flanders et al., 2004      | Male       | 168              | 10            | 10             | 59             | 89            | 0.50<br>(0.30-0.70)  | 0.60<br>(0.52-0.68)  | 1.25<br>(0.78-2.03)                | 0.83<br>(0.53-1.31)                | 1.5                            |
| Moberg et al., 2016        | Male       | 100              | 17            | 28             | 28             | 27            | 0.38<br>(0.25-0.52)  | 0.49<br>(0.36-0.62)  | 0.74<br>(0.47-1.17)                | 1.27<br>(0.89-1.80)                | 0.6                            |
| Steurer et al., 2011       | Male       | 621              | 61            | 66             | 247            | 247           | 0.48<br>(0.39-0.57)  | 0.50<br>(0.46-0.54)  | 0.96<br>(0.79-1.18)                | 1.04<br>(0.86-1.26)                | 0.9                            |
| van Vugt et al., 2013      | Male       | 2820             | 62            | 78             | 1066           | 1614          | 0.44<br>(0.36-0.53)  | 0.60<br>(0.58-0.62)  | 1.11<br>(0.92-1.35)                | 0.93<br>(0.80-1.08)                | 1.2                            |
| <b>Smoking</b>             |            |                  |               |                |                |               |                      |                      |                                    |                                    |                                |
| Flanders et al., 2004      | Smoker     | 168              | 2             | 18             | 17             | 131           | 0.1<br>(0.03-0.3)    | 0.89<br>(0.82-0.93)  | 0.87<br>(0.23-3.49)                | 1.02<br>(0.87-1.19)                | 0.9                            |
| Moberg et al., 2016        | Smoker     | 100              | 3             | 42             | 9              | 46            | 0.07<br>(0.02-0.18)  | 0.84<br>(0.72-0.91)  | 0.41<br>(0.12-1.42)                | 1.12<br>(0.97-1.28)                | 0.4                            |
| Steurer et al., 2011       | Smoker     | 621              | 36            | 91             | 145            | 349           | 0.28<br>(0.21-0.37)  | 0.71<br>(0.66-0.75)  | 0.97<br>(0.71-1.32)                | 1.01<br>(0.90-1.15)                | 0.9                            |
| van Vugt et al., 2013      | Smoker     | 2818             | 42            | 98             | 737            | 1941          | 0.30<br>(0.23-0.38)  | 0.72<br>(0.71-0.74)  | 1.09<br>(0.84-1.42)                | 0.97<br>(0.86-1.08)                | 1.1                            |

## Symptoms

| Author, Year               | Index test        | Total population | True positive | False negative | False positive | True negative | Sensitivity (95% CI) | Specificity (95% CI) | Positive likelihood ratio (95% CI) | Negative likelihood ratio (95% CI) | OR   |
|----------------------------|-------------------|------------------|---------------|----------------|----------------|---------------|----------------------|----------------------|------------------------------------|------------------------------------|------|
| <b>Fever</b>               |                   |                  |               |                |                |               |                      |                      |                                    |                                    |      |
| Flanders et al., 2004      | Fever             | 168              | 13            | 7              | 86             | 62            | 0.65<br>(0.43-0.82)  | 0.42<br>(0.34-0.50)  | 1.12<br>(0.79-1.59)                | 0.84<br>(0.45-0.51)                | 1.3  |
| Hopstaken et al., 2003     | Fever             | 243              | 15            | 17             | 70             | 141           | 0.47<br>(0.31-0.64)  | 0.67<br>(0.60-0.73)  | 1.41<br>(0.93-2.14)                | 0.80<br>(0.57-1.12)                | 1.8  |
| Melbye et al., 1992        | Fever             | 420              | NA            | NA             | NA             | NA            | 0.65                 | 0.51                 | 1.30<br>(0.9-2.0)                  | NA                                 | NA   |
| Steurer et al., 2011       | Fever             | 621              | 84            | 43             | 266            | 228           | 0.66<br>(0.58-0.74)  | 0.46<br>(0.42-0.51)  | 1.23<br>(1.06-1.42)                | 0.73<br>(0.95-1.11)                | 1.7  |
| van Vugt et al., 2013      | Fever             | 2817             | 82            | 58             | 907            | 1770          | 0.59<br>(0.50-0.66)  | 0.66<br>(0.64-0.68)  | 1.73<br>(1.49-2.01)                | 0.63<br>(0.51-0.76)                | 2.8  |
| <b>Chills</b>              |                   |                  |               |                |                |               |                      |                      |                                    |                                    |      |
| Hopstaken et al., 2003     | Chills            | 243              | 22            | 10             | 100            | 111           | 0.69<br>(0.51-0.82)  | 0.53<br>(0.46-0.59)  | 1.45<br>(1.10-1.91)                | 0.59<br>(0.35-1.00)                | 2.4  |
| Melbye et al., 1992        | Chills            | 420              | NA            | NA             | NA             | NA            | 0.80                 | 0.67                 | 1.9<br>(1.2-3.1)                   | NA                                 | NA   |
| <b>Cough</b>               |                   |                  |               |                |                |               |                      |                      |                                    |                                    |      |
| Ebrahimzadeh, et al., 2015 | Cough             | 840              | 376           | 44             | 272            | 148           | 0.89<br>(0.86-0.92)  | 0.35<br>(0.31-0.40)  | 1.38<br>(1.28-1.49)                | 0.30<br>(0.22-0.41)                | 4.6  |
| Flanders et al., 2004      | Cough             | 168              | 20            | 0              | 148            | 0             | 1.0<br>(0.84-1.0)    | 0.00                 | 1.00                               | NA                                 | NA   |
| Hopstaken et al., 2003     | Cough (dry)       | 243              | 12            | 20             | 46             | 165           | 0.38<br>(0.23-0.55)  | 0.78<br>(0.72-0.83)  | 1.72<br>(1.03-2.88)                | 0.80<br>(0.61-1.06)                | 2.2  |
| Melbye et al., 1992        | Cough (dry)       | 420              | NA            | NA             | NA             | NA            | 0.40                 | 0.81                 | 2.2<br>(1.1-4.1)                   | NA                                 | NA   |
| Signal et al., 1989        | Cough             | 255              | 33            | 7              | 116            | 99            | 0.83<br>(0.68-0.91)  | 0.46<br>(0.40-0.53)  | 1.53<br>(1.27-1.85)                | 0.38<br>(0.19-0.76)                | 4.02 |
| Steurer et al., 2011       | Cough             | 621              | 13            | 114            | 30             | 464           | 0.10<br>(0.06-0.17)  | 0.94<br>(0.91-0.96)  | 1.69<br>(0.91-3.14)                | 0.96<br>(1.02-0.89)                | 1.8  |
| van Vugt et al., 2013      | Cough             | 2818             | 140           | 0              | 2678           | 0             | 1.00<br>(0.97-1.0)   | 0.00                 | 1.00                               | NA                                 | NA   |
| <b>Sputum</b>              |                   |                  |               |                |                |               |                      |                      |                                    |                                    |      |
| Ebrahimzadeh, et al., 2015 | Sputum            | 840              | 354           | 66             | 168            | 252           | 0.84<br>(0.81-0.87)  | 0.60<br>(0.55-0.65)  | 2.11<br>(1.86-2.39)                | 0.26<br>(0.21-0.33)                | 8.0  |
| Flanders et al., 2004      | Yellow phlegm     | 168              | 7             | 13             | 54             | 94            | 0.35<br>(0.18-0.57)  | 0.64<br>(0.56-0.71)  | 0.96<br>(0.51-1.81)                | 1.02<br>(0.73-1.44)                | 0.9  |
| Hopstaken et al., 2003     | Sputum (purulent) | 243              | 19            | 13             | 114            | 97            | 0.59<br>(0.42-0.74)  | 0.46<br>(0.39-0.53)  | 1.10<br>(0.80-1.50)                | 0.88<br>(0.57-1.38)                | 1.2  |
| Melbye et al., 1992        | Sputum (purulent) | 420              | NA            | NA             | NA             | NA            | 0.35                 | 0.65                 | 1.0<br>(0.5-1.8)                   | NA                                 | NA   |



| Author, Year               | Index test            | Total population | True positive | False negative | False positive | True negative | Sensitivity (95% CI) | Specificity (95% CI) | Positive likelihood ratio (95% CI) | Negative likelihood ratio (95% CI) | OR   |
|----------------------------|-----------------------|------------------|---------------|----------------|----------------|---------------|----------------------|----------------------|------------------------------------|------------------------------------|------|
| Steurer et al., 2011       | Sputum (Mucopurulent) | 621              | 62            | 65             | 240            | 254           | 0.49 (0.40-0.57)     | 0.51 (0.47-0.56)     | 1.00 (0.82-1.23)                   | 0.99 (0.82-1.20)                   | 1.00 |
| van Vugt et al., 2013      | Phlegm                | 2818             | 120           | 20             | 2119           | 559           | 1.00 (0.96-1.0)      | 0.21 (0.19-0.22)     | 1.26 (1.24-1.29)                   | 0.00                               | NA   |
| <b>Bloody sputum</b>       |                       |                  |               |                |                |               |                      |                      |                                    |                                    |      |
| Flanders et al., 2004      | Bloody sputum         | 168              | 6             | 14             | 21             | 127           | 0.30 (0.14-0.52)     | 0.86 (0.79-0.91)     | 2.11 (0.97-4.60)                   | 0.82 (0.61-1.09)                   | 2.6  |
| Steurer et al., 2011       | Bloody sputum         | 621              | 15            | 112            | 27             | 467           | 0.12 (0.07-0.18)     | 0.95 (0.92-0.96)     | 2.16 (1.19-3.94)                   | 0.93 (0.87-1.00)                   | 2.3  |
| <b>Dyspnea</b>             |                       |                  |               |                |                |               |                      |                      |                                    |                                    |      |
| Ebrahimzadeh, et al., 2015 | Dyspnea               | 840              | 323           | 97             | 180            | 240           | 0.77 (0.73-0.81)     | 0.57 (0.52-0.62)     | 1.79 (1.59-2.03)                   | 0.40 (0.33-0.49)                   | 4.4  |
| Flanders et al., 2004      | Dyspnea               | 168              | 14            | 6              | 71             | 77            | 0.70 (0.48-0.85)     | 0.52 (0.44-0.60)     | 1.46 (1.05-2.03)                   | 0.58 (0.29-1.15)                   | 2.5  |
| Hopstaken et al., 2003     | Dyspnea               | 243              | 23            | 9              | 165            | 46            | 0.72 (0.55-0.84)     | 0.22 (0.17-0.28)     | 0.92 (0.73-1.16)                   | 1.29 (0.70-2.37)                   | 0.7  |
| Melbye et al., 1992        | Dyspnea               | 420              | NA            | NA             | NA             | NA            | 0.85                 | 0.37                 | 1.4 (1.0-1.8)                      | NA                                 | NA   |
| Signal et al., 1989        | Dyspnea               | 255              | 16            | 24             | 92             | 123           | 0.40 (0.26-0.55)     | 0.57 (0.50-0.64)     | 0.94 (0.62-1.41)                   | 1.05 (0.79-1.39)                   | 0.9  |
| Steurer et al., 2011       | Dyspnea               | 621              | 58            | 69             | 165            | 329           | 0.46 (0.37-0.54)     | 0.67 (0.62-0.71)     | 1.37 (1.72-0.69)                   | 0.82 (0.69-0.97)                   | 1.7  |
| van Vugt et al., 2013      | Dyspnea               | 2819             | 96            | 44             | 1498           | 1181          | 0.69 (0.60-0.76)     | 0.44 (0.42-0.46)     | 1.23 (1.09-1.38)                   | 0.71 (0.56-0.91)                   | 1.7  |
| <b>Chest pain</b>          |                       |                  |               |                |                |               |                      |                      |                                    |                                    |      |
| Ebrahimzadeh, et al., 2015 | Chest pain            | 840              | 315           | 105            | 201            | 219           | 0.75 (0.71-0.79)     | 0.52 (0.47-0.57)     | 1.57 (1.40-1.76)                   | 0.48 (0.40-0.58)                   | 3.3  |
| Flanders et al., 2004      | Chest pain            | 168              | 9             | 11             | 33             | 115           | 0.45 (0.26-0.66)     | 0.78 (0.70-0.84)     | 2.02 (1.14-3.57)                   | 0.71 (0.47-1.06)                   | 2.9  |
| Hopstaken et al., 2003     | Chest pain            | 243              | 21            | 11             | 124            | 87            | 0.65 (0.48-0.80)     | 0.41 (0.35-0.48)     | 1.12 (0.85-1.47)                   | 0.83 (0.50-1.38)                   | 1.4  |
| Melbye et al., 1992        | Chest pain            | 420              | NA            | NA             | NA             | NA            | 0.40                 | 0.79                 | 1.9 (1.0-3.6)                      | NA                                 | NA   |
| Moberg et al., 2016        | Chest pain            | 100              | 7             | 38             | 10             | 45            | 0.16 (0.08-0.29)     | 0.82 (0.70-0.90)     | 0.86 (0.35-2.07)                   | 1.03 (0.87-1.23)                   | 0.8  |
| Signal et al., 1989        | Chest pain            | 255              | 19            | 21             | 80             | 135           | 0.48 (0.33-0.63)     | 0.63 (0.56-0.69)     | 1.28 (0.88-1.85)                   | 0.84 (0.61-1.14)                   | 1.5  |
| Steurer et al., 2011       | Chest pain            | 621              | 46            | 81             | 133            | 361           | 0.36 (0.28-0.45)     | 0.73 (0.69-0.77)     | 1.35 (1.02-1.77)                   | 0.87 (0.76-1.01)                   | 1.5  |
| van Vugt et al., 2013      | Chest pain            | 2817             | 80            | 60             | 1224           | 1453          | 0.57 (0.49-0.65)     | 0.54 (0.52-0.56)     | 1.25 (1.08-1.45)                   | 0.79 (0.65-0.96)                   | 1.6  |
| <b>Coryza</b>              |                       |                  |               |                |                |               |                      |                      |                                    |                                    |      |
| Flanders et al., 2004      | Runny nose            | 168              | 9             | 11             | 106            | 42            | 0.45 (0.26-0.66)     | 0.28 (0.22-0.36)     | 0.63 (0.38-1.03)                   | 1.94 (1.21-3.11)                   | 0.3  |

| Author, Year              | Index test         | Total population | True positive | False negative | False positive | True negative | Sensitivity (95% CI) | Specificity (95% CI) | Positive likelihood ratio (95% CI) | Negative likelihood ratio (95% CI) | OR  |
|---------------------------|--------------------|------------------|---------------|----------------|----------------|---------------|----------------------|----------------------|------------------------------------|------------------------------------|-----|
| Melbye et al., 1992       | Coryza             | 420              | NA            | NA             | NA             | NA            | 0.65                 | 0.18                 | 0.8<br>(0.6-1.1)                   | NA                                 | NA  |
| van Vugt et al., 2013     | Runny nose         | 2819             | 79            | 61             | 1932           | 747           | 0.56<br>(0.48-0.64)  | 0.28<br>(0.27-0.30)  | 0.78<br>(0.68-0.91)                | 1.56<br>(1.28-1.91)                | 0.5 |
| <b>Sore throat</b>        |                    |                  |               |                |                |               |                      |                      |                                    |                                    |     |
| Flanders et al., 2004     | Sore throat        | 168              | 9             | 11             | 100            | 48            | 0.45<br>(0.26-0.66)  | 0.32<br>(0.25-0.40)  | 0.67<br>(0.41-1.10)                | 1.70<br>(1.07-2.69)                | 0.4 |
| Melbye et al., 1992       | Sore throat        | 420              | NA            | NA             | NA             | NA            | 0.45                 | 0.25                 | 0.6<br>(0.4-1.0)                   | NA                                 | NA  |
| <b>Fatigue</b>            |                    |                  |               |                |                |               |                      |                      |                                    |                                    |     |
| Flanders et al., 2004     | Fatigue            | 168              | 14            | 6              | 109            | 39            | 0.70<br>(0.48-0.85)  | 0.26<br>(0.20-0.34)  | 0.95<br>(0.70-1.29)                | 1.14<br>(0.55-2.34)                | 0.8 |
| Melbye et al., 1992       | Fatigue            | 420              | NA            | NA             | NA             | NA            | 1.00                 | 0.11                 | 1.1<br>(1.0-1.3)                   | NA                                 | NA  |
| <b>Myalgia/arthralgia</b> |                    |                  |               |                |                |               |                      |                      |                                    |                                    |     |
| Flanders et al., 2004     | Myalgia            | 168              | 14            | 6              | 79             | 69            | 0.7<br>(0.48-0.85)   | 0.47<br>(0.39-0.55)  | 1.31<br>(0.95-1.81)                | 0.64<br>(0.32-1.29)                | 2.0 |
| Melbye et al., 1992       | Myalgia/arthralgia | 420              | NA            | NA             | NA             | NA            | 0.55                 | 0.45                 | 1.0<br>(0.7-1.5)                   | NA                                 | NA  |
| <b>Wheezing</b>           |                    |                  |               |                |                |               |                      |                      |                                    |                                    |     |
| Flanders et al., 2004     | Wheezing           | 168              | 11            | 9              | 48             | 100           | 0.55<br>(0.34-0.74)  | 0.68<br>(0.60-0.75)  | 1.70<br>(1.07-2.69)                | 0.67<br>(0.41-1.10)                | 2.5 |
| Steurer et al., 2011      | Wheezing           | 621              | 24            | 103            | 85             | 409           | 0.19<br>(0.13-0.27)  | 0.83<br>(0.79-0.86)  | 1.10<br>(0.73-1.65)                | 0.98<br>(0.89-1.08)                | 1.1 |
| <b>Diarrhoea</b>          |                    |                  |               |                |                |               |                      |                      |                                    |                                    |     |
| Hopstaken et al., 2003    | Diarrhoea          | 243              | 6             | 26             | 13             | 198           | 0.19<br>(0.09-0.35)  | 0.94<br>(0.90-0.96)  | 3.04<br>(1.25-7.43)                | 0.87<br>(0.73-1.03)                | 3.5 |
| van Vugt et al., 2013     | Diarrhoea          | 2818             | 15            | 125            | 184            | 2494          | 0.11<br>(0.07-0.17)  | 0.93<br>(0.92-0.94)  | 1.56<br>(0.95-2.57)                | 0.96<br>(0.90-1.02)                | 1.6 |

## Signs

| Author, Year               | Index test                              | Total population | True positive | False negative | False positive | True negative | Sensitivity (95% CI) | Specificity (95% CI) | Positive likelihood ratio (95% CI) | Negative likelihood ratio (95% CI) | OR   |
|----------------------------|-----------------------------------------|------------------|---------------|----------------|----------------|---------------|----------------------|----------------------|------------------------------------|------------------------------------|------|
| <b>Temperature</b>         |                                         |                  |               |                |                |               |                      |                      |                                    |                                    |      |
| Ebrahimzadeh, et al., 2015 | temperature $\geq 38^{\circ}\text{C}$   | 840              | 285           | 135            | 68             | 352           | 0.68 (0.63-0.72)     | 0.84 (0.80-0.87)     | 4.19 (3.34-5.26)                   | 0.38 (0.33-0.44)                   | 10.9 |
| Flanders et al., 2004      | temperature $\geq 37.8^{\circ}\text{C}$ | 155              | 10            | 9              | 19             | 117           | 0.53 (0.32-0.73)     | 0.86 (0.79-0.91)     | 3.77 (2.08-6.84)                   | 0.55 (0.34-0.89)                   | 6.8  |
| Moberg et al., 2016        | temperature $> 38^{\circ}\text{C}$      | 100              | 15            | 30             | 6              | 49            | 0.33 (0.21-0.48)     | 0.89 (0.78-0.95)     | 3.06 (1.29-7.22)                   | 0.75 (0.60-0.94)                   | 4.1  |
| Holm, Nexoe, et al., 2007  | temperature $\geq 38^{\circ}\text{C}$   | 354              | 14            | 33             | 33             | 274           | 0.30 (0.19-0.44)     | 0.89 (0.85-0.92)     | 2.8 (1.61-4.78)                    | 0.79 (0.65-0.95)                   | 3.5  |
| Hopstaken et al., 2003     | temperature $\geq 38^{\circ}\text{C}$   | 243              | 13            | 19             | 45             | 166           | 0.41 (0.26-0.58)     | 0.79 (0.73-0.84)     | 1.91 (1.16-3.12)                   | 0.76 (0.56-1.01)                   | 2.5  |
| Hopstaken et al., 2009     | temperature $\geq 38^{\circ}\text{C}$   | 95               | 4             | 7              | 14             | 70            | 0.36 (0.15-0.65)     | 0.83 (0.74-0.90)     | 2.18 (0.87-5.46)                   | 0.76 (0.8-1.21)                    | 2.9  |
| Melbye et al., 1992        | temperature $\geq 37.5^{\circ}\text{C}$ | 420              | NA            | NA             | NA             | NA            | 0.50                 | 0.70                 | 1.7 (1.0-2.9)                      | NA                                 | NA   |
| Nolt et al., 2007          | temperature $\geq 38.6^{\circ}\text{C}$ | 4464             | NA            | NA             | NA             | NA            | NA                   | NA                   | 4.15 (3.28-5.26)                   | NA                                 | NA   |
| van Vugt et al., 2013      | temperature $> 37.8^{\circ}\text{C}$    | 2793             | 22            | 118            | 136            | 2517          | 0.15 (0.11-0.23)     | 0.95 (0.94-0.96)     | 3.01 (2.02-4.65)                   | 0.89 (0.83-0.96)                   | 3.5  |
| <b>Pulse rate</b>          |                                         |                  |               |                |                |               |                      |                      |                                    |                                    |      |
| Ebrahimzadeh, et al., 2015 | pulse rate $> 100 \text{ min}^{-1}$     | 840              | 231           | 189            | 63             | 357           | 0.55 (0.50-0.60)     | 0.85 (0.81-0.88)     | 3.67 (2.87-4.68)                   | 0.53 (0.47-0.59)                   | 6.9  |
| Flanders et al., 2004      | pulse rate $\geq 100 \text{ min}^{-1}$  | 157              | 11            | 9              | 26             | 111           | 0.55 (0.34-0.74)     | 0.81 (0.74-0.87)     | 2.90 (1.71-4.91)                   | 0.56 (0.34-0.91)                   | 5.2  |
| Moberg et al., 2016        | pulse rate $> 100 \text{ min}^{-1}$     | 100              | 13            | 32             | 15             | 40            | 0.29 (0.18-0.43)     | 0.73 (0.60-0.83)     | 1.06 (0.56-1.99)                   | 0.98 (0.76-1.25)                   | 1.1  |
| Holm, Nexoe, et al., 2007  | pulse rate $> 100 \text{ min}^{-1}$     | 364              | 12            | 36             | 31             | 285           | 0.25 (0.15-0.39)     | 0.90 (0.86-0.93)     | 2.55 (1.41-4.61)                   | 0.83 (0.70-0.98)                   | 3.1  |
| Nolt et al., 2007          | pulse rate $\geq 120 \text{ min}^{-1}$  | 4464             | NA            | NA             | NA             | NA            | NA                   | NA                   | 4.55 (3.57-5.79)                   | NA                                 | NA   |

| Author, Year               | Index test                             | Total population | True positive | False negative | False positive | True negative | Sensitivity (95% CI) | Specificity (95% CI) | Positive likelihood ratio (95% CI) | Negative likelihood ratio (95% CI) | OR   |
|----------------------------|----------------------------------------|------------------|---------------|----------------|----------------|---------------|----------------------|----------------------|------------------------------------|------------------------------------|------|
| van Vugt et al., 2013      | pulse rate >100 min <sup>-1</sup>      | 2784             | 17            | 123            | 94             | 2550          | 0.12 (0.08-0.19)     | 0.96 (0.96-0.97)     | 3.42 (2.10-5.56)                   | 0.91 (0.86-0.97)                   | 3.7  |
| <b>Respiratory rate</b>    |                                        |                  |               |                |                |               |                      |                      |                                    |                                    |      |
| Ebrahimzadeh, et al., 2015 | respiratory rate ≥20 min <sup>-1</sup> | 840              | 252           | 168            | 44             | 376           | 0.60 (0.55-0.65)     | 0.89 (0.86-0.92)     | 5.73 (4.28-7.66)                   | 0.45 (0.40-0.51)                   | 12.8 |
| Flanders et al., 2004      | respiratory rate ≥24 min <sup>-1</sup> | 121              | 7             | 11             | 2              | 101           | 0.39 (0.20-0.61)     | 0.98 (0.93-0.99)     | 20.03 (4.52-88.83)                 | 0.62 (0.43-0.90)                   | 32.1 |
| Moberg et al., 2016        | respiratory rate >20 min <sup>-1</sup> | 100              | 26            | 19             | 29             | 26            | 0.58 (0.43-0.71)     | 0.47 (0.35-0.60)     | 1.10 (0.77-1.56)                   | 0.89 (1.39-0.56)                   | 1.2  |
| Holm, Nexoe, et al., 2007  | respiratory rate ≥22 min <sup>-1</sup> | 364              | 24            | 24             | 65             | 251           | 0.50 (0.36-0.63)     | 0.79 (0.75-0.83)     | 2.43 (1.7-3.47)                    | 0.63 (0.47-0.84)                   | 3.9  |
| Hopstaken et al., 2003     | respiratory rate >20 min <sup>-1</sup> | 243              | 1             | 31             | 8              | 203           | 0.03 (0.00-0.16)     | 0.96 (0.93-0.98)     | 0.82 (0.11-6.37)                   | 1.01 (0.94-1.08)                   | 0.8  |
| Nolt et al., 2007          | respiratory rate ≥30 min <sup>-1</sup> | 4464             | NA            | NA             | NA             | NA            | NA                   | NA                   | 9.42 (6.07-14.61)                  | NA                                 | NA   |
| van Vugt et al., 2013      | respiratory rate >24 min <sup>-1</sup> | 2753             | 6             | 134            | 49             | 2564          | 0.04 (0.02-0.09)     | 0.98 (0.98-0.99)     | 2.29 (1.00-5.24)                   | 0.98 (0.94-1.01)                   | 2.4  |
| <b>O2 saturation</b>       |                                        |                  |               |                |                |               |                      |                      |                                    |                                    |      |
| Flanders et al., 2004      | O2 saturation ≤93%                     | 112              | 6             | 14             | 1              | 91            | 0.30 (0.15-0.52)     | 0.99 (0.94-1.00)     | 27.6 (3.51-216.77)                 | 0.71 (0.53-0.94)                   | 39.0 |
| Moberg et al., 2016        | O2 saturation <95%                     | 100              | 14            | 31             | 12             | 43            | 0.31 (0.19-0.46)     | 0.78 (0.66-0.87)     | 1.43 (0.74-2.77)                   | 0.88 (0.69-1.12)                   | 1.6  |
| Holm, Nexoe, et al., 2007  | O2 saturation <95%                     | 357              | 25            | 23             | 61             | 248           | 0.52 (0.38-0.66)     | 0.80 (0.75-0.84)     | 2.64 (1.86-3.75)                   | 0.60 (0.44-0.81)                   | 4.4  |
| Nolt et al., 2007          | O2 saturation <90%                     | 4464             | NA            | NA             | NA             | NA            | NA                   | NA                   | 10.91 (7.48-15.91)                 | NA                                 | NA   |
| <b>Crackles</b>            |                                        |                  |               |                |                |               |                      |                      |                                    |                                    |      |
| Moberg et al., 2016a       | Crackles                               | 100              | 21            | 24             | 27             | 28            | 0.47 (0.33-0.61)     | 0.51 (0.38-0.64)     | 0.95 (0.63-1.44)                   | 1.05 (0.72-1.53)                   | 0.91 |
| Moberg et al., 2016b       | Rales                                  | 100              | 15            | 8              | 30             | 47            | 0.33 (0.21-0.48)     | 0.85 (0.74-0.92)     | 2.29 (1.07-4.91)                   | 0.78 (0.62-0.99)                   | 2.9  |
| Hopstaken et al., 2003     | Crackles                               | 243              | 9             | 23             | 41             | 170           | 0.28 (0.16-0.45)     | 0.81 (0.75-0.85)     | 1.45 (0.78-2.69)                   | 0.89 (0.71-1.12)                   | 1.6  |

| Author, Year                   | Index test              | Total population | True positive | False negative | False positive | True negative | Sensitivity (95% CI) | Specificity (95% CI) | Positive likelihood ratio (95% CI) | Negative likelihood ratio (95% CI) | OR   |
|--------------------------------|-------------------------|------------------|---------------|----------------|----------------|---------------|----------------------|----------------------|------------------------------------|------------------------------------|------|
| Melbye et al., 1992            | Crackles                | 420              | NA            | NA             | NA             | NA            | 0.20                 | 0.94                 | 4.4<br>(1.4-13.6)                  | NA                                 | NA   |
| Signal et al., 1989            | Crackles                | 255              | 16            | 24             | 49             | 166           | 0.40<br>(0.26-0.55)  | 0.77<br>(0.71-0.82)  | 1.76<br>(1.12-2.76)                | 0.78<br>(0.59-1.0)                 | 2.26 |
| van Vugt et al., 2013          | Crackles                | 2807             | 45            | 95             | 220            | 2447          | 0.32<br>(0.25-0.40)  | 0.92<br>(0.91-0.93)  | 3.90<br>(2.97-5.11)                | 0.74<br>(0.66-0.83)                | 5.3  |
| Flanders et al., 2004          | Rales                   | 166              | 10            | 10             | 5              | 141           | 0.50<br>(0.30-0.70)  | 0.97<br>(0.92-0.99)  | 14.60<br>(5.55-38.38)              | 0.52<br>(0.80-8.08)                | 28.2 |
| <b>Decreased breath sounds</b> |                         |                  |               |                |                |               |                      |                      |                                    |                                    |      |
| Flanders et al., 2004          | Decreased breath sounds | 166              | 12            | 8              | 15             | 131           | 0.60<br>(0.39-0.78)  | 0.90<br>(0.84-0.94)  | 5.84<br>(3.21-10.62)               | 0.45<br>(0.26-0.77)                | 13.1 |
| Moberg et al., 2016            | Decreased breath sounds | 100              | 9             | 36             | 14             | 41            | 0.20<br>(0.11-0.34)  | 0.75<br>(0.62-0.84)  | 0.79<br>(0.38-1.65)                | 1.07<br>(0.87-1.33)                | 0.73 |
| Melbye et al., 1992            | Decreased breath sounds | 420              | NA            | NA             | NA             | NA            | 0.15                 | 0.95                 | 3.2<br>(1.0-10.0)                  | NA                                 | NA   |
| Steurer et al., 2011           | Decreased breath sounds | 621              | 31            | 96             | 43             | 451           | 0.24<br>(0.178-0.33) | 0.91<br>(0.88-0.93)  | 2.8<br>(1.85-4.26)                 | 0.83<br>(0.75-0.92)                | 3.39 |
| van Vugt et al., 2013          | Decreased breath sounds | 2805             | 31            | 109            | 331            | 2334          | 0.22<br>(0.16-0.30)  | 0.88<br>(0.86-0.89)  | 1.78<br>(1.30-2.47)                | 0.89<br>(0.81-0.97)                | 2.0  |
| <b>Bronchial breathing</b>     |                         |                  |               |                |                |               |                      |                      |                                    |                                    |      |
| Hopstaken et al., 2003         | Bronchial breathing     | 243              | 11            | 21             | 53             | 158           | 0.34<br>(0.20-0.52)  | 0.75<br>(0.69-0.80)  | 1.37<br>(0.80-2.33)                | 0.88<br>(0.67-1.14)                | 1.6  |
| Steurer et al., 2011           | Bronchial breathing     | 621              | 24            | 103            | 28             | 466           | 0.19<br>(0.13-0.27)  | 0.94<br>(0.92-0.96)  | 3.33<br>(2.00-5.55)                | 0.86<br>(0.79-0.94)                | 3.9  |
| <b>Wheezes</b>                 |                         |                  |               |                |                |               |                      |                      |                                    |                                    |      |
| Flanders et al., 2004          | Wheezing                | 166              | 5             | 15             | 28             | 118           | 0.25<br>(0.11-0.47)  | 0.80<br>(0.74-0.86)  | 1.30<br>(0.57-2.99)                | 0.93<br>(0.71-1.21)                | 1.4  |
| Melbye et al., 1992            | Wheezing                | 420              | NA            | NA             | NA             | NA            | 0.15                 | 0.85                 | 1.0<br>(0.3-2.8)                   | NA                                 | NA   |
| Signal et al., 1989            | Wheezing                | 255              | 11            | 29             | 47             | 168           | 0.28<br>(0.16-0.43)  | 0.78<br>(0.72-0.83)  | 1.26<br>(0.72-2.21)                | 0.93<br>(0.76-1.14)                | 1.36 |
| <b>Dullness on percussion</b>  |                         |                  |               |                |                |               |                      |                      |                                    |                                    |      |
| Moberg et al., 2016            | Dullness on percussion  | 100              | 5             | 40             | 10             | 45            | 0.11<br>(0.05-0.24)  | 0.82<br>(0.70-0.90)  | 0.61<br>(0.23-1.66)                | 1.09<br>(0.92-1.28)                | 0.6  |

| Author, Year           | Index test             | Total population | True positive | False negative | False positive | True negative | Sensitivity (95% CI) | Specificity (95% CI) | Positive likelihood ratio (95% CI) | Negative likelihood ratio (95% CI) | OR  |
|------------------------|------------------------|------------------|---------------|----------------|----------------|---------------|----------------------|----------------------|------------------------------------|------------------------------------|-----|
| Hopstaken et al., 2003 | Dullness on percussion | 243              | 0             | 32             | 11             | 200           | 0.00                 | 0.95 (0.90-0.97)     | 0.00                               | 1.10                               | 0.0 |
| Melbye et al., 1992    | Dullness on percussion | 420              | NA            | NA             | NA             | NA            | 0.14                 | 0.96                 | 4.0 (1.0-16.7)                     | NA                                 | NA  |
| Steurer et al., 2011   | Dullness on percussion | 621              | 25            | 102            | 13             | 481           | 0.20 (0.14-0.27)     | 0.97 (0.96-0.98)     | 7.48 (3.94-14.20)                  | 0.83 (0.76-0.90)                   | 9.1 |

## Laboratory tests

| Author, Year                 | Index test               | Total population | True positive | False negative | False positive | True negative | Sensitivity (95% CI) | Specificity (95% CI) | Positive likelihood ratio (95% CI) | Negative likelihood ratio (95% CI) | OR   |
|------------------------------|--------------------------|------------------|---------------|----------------|----------------|---------------|----------------------|----------------------|------------------------------------|------------------------------------|------|
| <b>WBC</b>                   |                          |                  |               |                |                |               |                      |                      |                                    |                                    |      |
| Ebrahimzadeh, et al., 2015   | WBC $\geq$ 10 million/ml | 840              | 204           | 216            | 94             | 326           | 0.49 (0.44-0.53)     | 0.78 (0.74-0.81)     | 2.17 (1.78-2.66)                   | 0.66 (0.60-0.74)                   | 3.3  |
| Moberg et al., 2016          | WBC $\geq$ 15 million/ml | 100              | 7             | 38             | 5              | 50            | 0.16 (0.08-0.29)     | 0.91 (0.80-0.96)     | 1.71 (0.58-5.03)                   | 0.93 (0.80-1.08)                   | 1.8  |
| Holm, Nexoe, et al., 2007    | WBC $\geq$ 10 million/ml | 362              | 22            | 26             | 64             | 250           | 0.46 (0.33-0.60)     | 0.80 (0.75-0.84)     | 2.25 (1.54-3.28)                   | 0.68 (0.52-0.9)                    | 3.3  |
| Melbye et al., 1992          | WBC $\geq$ 10 million/ml | 420              | NA            | NA             | NA             | NA            | 0.53                 | 0.85                 | 3.1 (1.7-5.7)                      | NA                                 | NA   |
| <b>ESR</b>                   |                          |                  |               |                |                |               |                      |                      |                                    |                                    |      |
| Melbye et al., 1992          | ESR $\geq$ 35mm/h        | 420              | NA            | NA             | NA             | NA            | 0.50                 | 0.89                 | 4.3 (2.4-7.8)                      | NA                                 | NA   |
| <b>Procalcitonin</b>         |                          |                  |               |                |                |               |                      |                      |                                    |                                    |      |
| Holm, Pedersen, et al., 2007 | PCT $>$ 0.25ng/ml        | 357              | 11            | 36             | 4              | 306           | 0.23 (0.14-0.37)     | 0.99 (0.97-0.99)     | 18.14 (6.02-54.63)                 | 0.78 (0.66-0.91)                   | 23.4 |
| van Vugt et al., 2013        | PCT $>$ 0.25ng/ml        | 2664             | 20            | 120            | 140            | 2414          | 0.14 (0.09-0.21)     | 0.95 (0.94-0.95)     | 2.61 (1.68-4.03)                   | 0.91 (0.85-0.97)                   | 2.9  |
| Holm, Pedersen, et al., 2007 | PCT $>$ 0.50ng/ml        | 357              | 8             | 39             | 0              | 310           | 0.17 (0.09-0.30)     | 1.00 (0.99-1.00)     | NA                                 | 0.83 (0.73-0.94)                   | NA   |
| van Vugt et al., 2013        | PCT $>$ 0.50ng/ml        | 2664             | 14            | 126            | 66             | 2458          | 0.10 (0.06-0.16)     | 0.97 (0.97-0.98)     | 3.8 (2.20-6.64)                    | 0.92 (0.87-0.98)                   | 4.1  |
| <b>CRP</b>                   |                          |                  |               |                |                |               |                      |                      |                                    |                                    |      |
| Holm, Nexoe, et al., 2007    | CRP $\geq$ 20mg/l        | 363              | 35            | 13             | 110            | 205           | 0.73 (0.59-0.83)     | 0.65 (0.60-0.70)     | 2.09 (1.66-2.63)                   | 0.42 (0.26-0.68)                   | 5.0  |
| Hopstaken et al., 2009       | CRP $>$ 20mg/l           | 95               | 11            | 0              | 41             | 43            | 1.00 (0.74-1.0)      | 0.51 (0.41-0.62)     | 2.05 (1.65-2.55)                   | 0.00                               | NA   |
| van Vugt et al., 2013        | CRP $>$ 20mg/l           | 2678             | 85            | 55             | 641            | 1897          | 0.61 (0.52-0.68)     | 0.75 (0.73-0.76)     | 2.40 (2.07-2.79)                   | 0.53 (0.43-0.65)                   | 4.6  |
| Moberg et al., 2016          | CRP $>$ 50mg/l           | 100              | 37            | 8              | 20             | 35            | 0.82 (0.69-0.91)     | 0.64 (0.50-0.75)     | 2.26 (1.55-3.29)                   | 0.28 (0.14-0.54)                   | 8.1  |

| Author, Year                                    | Index test         | Total population | True positive | False negative | False positive | True negative | Sensitivity (95% CI) | Specificity (95% CI) | Positive likelihood ratio (95% CI) | Negative likelihood ratio (95% CI) | OR    |
|-------------------------------------------------|--------------------|------------------|---------------|----------------|----------------|---------------|----------------------|----------------------|------------------------------------|------------------------------------|-------|
| Melbye et al., 1992                             | CRP $\geq$ 50mg/l  | 420              | NA            | NA             | NA             | NA            | 0.50                 | 0.90                 | 4.8<br>(2.70-8.60)                 | NA                                 | NA    |
| van Vugt et al., 2013                           | CRP>50mg/l         | 2678             | 58            | 82             | 197            | 2341          | 0.41<br>(0.34-0.50)  | 0.92<br>(0.91-0.93)  | 5.34<br>(4.21-6.77)                | 0.63<br>(0.55-0.73)                | 8.4   |
| Flanders et al., 2004                           | CRP $\geq$ 100mg/l | 168              | 7             | 13             | 1              | 147           | 0.35<br>(0.18-0.57)  | 0.99<br>(0.96-1.0)   | 51.80<br>(6.72-399.41)             | 0.65<br>(0.47-0.90)                | 79.15 |
| Hopstaken et al., 2009                          | CRP>100mg/l        | 95               | 9             | 2              | 13             | 71            | 0.82<br>(0.52-0.95)  | 0.85<br>(0.75-0.91)  | 5.29<br>(2.98-9.37)                | 0.21<br>(0.06-0.76)                | 24.58 |
| Steurer et al., 2011                            | CRP $\geq$ 100mg/l | 621              | 73            | 54             | 61             | 433           | 0.57<br>(0.49-0.66)  | 0.88<br>(0.84-0.90)  | 4.66<br>(3.52-6.15)                | 0.49<br>(0.40-0.60)                | 9.6   |
| van Vugt et al., 2013                           | CRP>100mg/l        | 2678             | 34            | 106            | 62             | 2476          | 0.24<br>(0.18-0.32)  | 0.98<br>(0.97-0.98)  | 9.94<br>(6.78-14.57)               | 0.78<br>(0.71-0.85)                | 12.8  |
| <b>Lipopolysaccharide binding protein (LBP)</b> |                    |                  |               |                |                |               |                      |                      |                                    |                                    |       |
| Hopstaken et al., 2009                          | LBP>10             | 95               | 11            | 0              | 56             | 28            | 1.00<br>(0.74-1.0)   | 0.33<br>(0.24-0.44)  | 1.5<br>(1.29-1.75)                 | 0.00                               | NA    |
|                                                 | LBP>20             | 95               | 9             | 2              | 17             | 67            | 0.81<br>(0.52-0.95)  | 0.79<br>(0.70-0.87)  | 4.04<br>(2.43-6.71)                | 0.23<br>(0.07-0.80)                | 17.7  |
|                                                 | LBP>30             | 95               | 8             | 3              | 8              | 76            | 0.73<br>(0.43-0.90)  | 0.90<br>(0.82-0.95)  | 7.64<br>(3.6-16.20)                | 0.30<br>(0.12-0.79)                | 25.33 |
| <b>Fibrinogen</b>                               |                    |                  |               |                |                |               |                      |                      |                                    |                                    |       |
| Hopstaken et al., 2009                          | Fibrinogen>4       | 95               | 10            | 1              | 38             | 46            | 0.90<br>(0.62-0.98)  | 0.55<br>(0.44-0.65)  | 2.01<br>(1.49-2.71)                | 0.17<br>(0.03-1.09)                | 12.11 |
|                                                 | Fibrinogen>5       | 95               | 9             | 2              | 9              | 75            | 0.81<br>(0.52-0.95)  | 0.89<br>(0.81-0.94)  | 7.63<br>(3.88-15.03)               | 0.20<br>(0.06-0.72)                | 37.5  |
